# Supplementary material
Source: PubMed Central journal article supplement (PMC2907095)
Supplement: bi100364f_si_001.pdf [file bi100364f_si_001.pdf]

**Minor Groove Orientation of the KWKK Peptide Tethered via the N-terminal Amine to the Acrolein-Derived 1,*N*<sup>2</sup>- $\gamma$ -Hydroxy-propanodeoxyguanosine Lesion with a Trimethylene Linkage<sup>†</sup>**

**Supporting Information**

Hai Huang<sup>‡</sup>, Ivan D. Kozekov<sup>‡</sup>, Alben Kozekova<sup>‡</sup>, Carmelo J. Rizzo<sup>‡</sup>, Amanda McCullough<sup>§</sup>, R. Stephen Lloyd<sup>§</sup>, and Michael P. Stone<sup>‡,\*</sup>

<sup>‡</sup>Department of Chemistry, Center in Molecular Toxicology, Center of Structural Biology and Vanderbilt-Ingram Cancer Center, Vanderbilt University, Nashville, TN 37235 and <sup>§</sup>Center for Research on Occupational and Environmental Toxicology, Oregon Health and Science University, Portland, OR 97239

\*Author to whom correspondence should be addressed.

Telephone 615-322-2589, FAX 615-322-7591, Email: michael.p.stone@vanderbilt.edu

Abbreviations: DPC, DNA-protein conjugate;  $\gamma$ -OH-PdG,  $\gamma$ -hydroxy-1,*N*<sup>2</sup>-propanodeoxyguanosine; NOESY, nuclear Overhauser effect spectroscopy; COSY, correlation spectroscopy; DQF-COSY, double-quantum filtered COSY; NOE, nuclear Overhauser effect; rMD, restrained molecular dynamics

<sup>†</sup>This work was supported by National Institutes of Health (NIH) grants PO1 ES-05355 (I.D.K., C.J.R., R.S.L., and M.P.S.), and RO1 CA-106858 and RO1 ES-04091 (A.K.M. and R.S.L.) Funding for the NMR spectrometers was supplied by Vanderbilt University, the Vanderbilt Center in Molecular Toxicology (P30 ES-000267), and by NIH Shared Instrumentation grant RR-005805. The Vanderbilt Ingram Cancer Center is supported by NIH grant P30 CA-068485.

## SUPPORTING INFORMATION

**Table S1.** Chemical Shifts of the Nucleotide Protons.

**Table S2.** Chemical Shifts of the Trimethylene Tether and Amino Acid Protons.

**Table S3.** NOE Distance Restraints Used for the Structure Refinement.

**Table S4.** Backbone Torsion Angles of the Refined Structure.

**Figure S1.** Partial Charges of the Trimethylene Tether Obtained from DFT Calculation.

**Figure S2.** NOE Connectivity of Nucleobase H6/H8 Protons to Deoxyribose H1' Protons.

**Figure S3.** Assignment of Nucleotide Exchangeable Protons.

**Figure S4.** Chemical Shift Perturbations of the DNA-Peptide Conjugate.

**Figure S5.** Sixth Root CORMA Residuals ( $R_1^{\chi}$ ) of the DNA-Peptide Conjugate.

**Table S1.** Chemical Shifts of the Nucleotide Protons.

| Nucleotide      | Chemical Shift (ppm) |                       |      |      |      |      |
|-----------------|----------------------|-----------------------|------|------|------|------|
|                 | H6/H8                | H2/H5/CH <sub>3</sub> | H1'  | H2'  | H2'' | H3'  |
| G <sup>1</sup>  | 8.00                 |                       | 6.03 | 2.68 | 2.80 | 4.86 |
| C <sup>2</sup>  | 7.56                 | 5.42                  | 6.08 | 2.14 | 2.52 | 4.84 |
| T <sup>3</sup>  | 7.43                 | 1.69                  | 5.56 | 2.15 | 2.42 | 4.89 |
| A <sup>4</sup>  | 8.24                 | 7.42                  | 6.05 | 2.77 | 2.92 | 5.07 |
| G <sup>5</sup>  | 7.68                 |                       | 5.7  | 2.49 | 2.63 | 4.97 |
| C <sup>6</sup>  | 7.17                 | 5.23                  | 5.65 | 1.69 | 2.21 | 4.79 |
| G <sup>7</sup>  | 7.89                 |                       | 5.48 | 2.70 | 2.72 | 4.99 |
| A <sup>8</sup>  | 8.13                 | 7.75                  | 6.10 | 2.77 | 2.88 | 4.99 |
| G <sup>9</sup>  | 7.49                 |                       | 5.72 | 2.31 | 2.56 | 4.71 |
| T <sup>10</sup> | 7.21                 | 1.24                  | 6.05 | 2.11 | 2.52 | 4.84 |
| C <sup>11</sup> | 7.61                 | 5.72                  | 6.11 | 2.25 | 2.50 | 4.85 |
| C <sup>12</sup> | 7.72                 | 5.86                  | 6.27 | 2.3  | 2.30 | 4.58 |
| G <sup>13</sup> | 7.82                 |                       | 5.64 | 2.46 | 2.63 | 4.81 |
| G <sup>14</sup> | 7.86                 |                       | 5.56 | 2.71 | 2.79 | 5.03 |
| A <sup>15</sup> | 8.23                 | 7.94                  | 6.29 | 2.76 | 2.93 | 5.07 |
| C <sup>16</sup> | 7.28                 | 5.22                  | 5.84 | 1.96 | 2.50 | 4.69 |
| T <sup>17</sup> | 7.38                 | 1.53                  | 6.08 | 2.12 | 2.50 | 4.88 |
| C <sup>18</sup> | 7.49                 | 5.67                  | 5.51 | 2.05 | 2.24 | 4.84 |
| G <sup>19</sup> | 7.91                 |                       | 5.91 | 2.73 | 2.75 | 4.97 |
| C <sup>20</sup> | 7.38                 | 5.36                  | 5.88 | 1.95 | 2.42 | 4.70 |
| T <sup>21</sup> | 7.36                 | 1.66                  | 5.51 | 2.08 | 2.37 | 4.83 |
| A <sup>22</sup> | 8.22                 | 7.46                  | 6.03 | 2.75 | 2.88 | 5.05 |
| G <sup>23</sup> | 7.70                 |                       | 5.82 | 2.49 | 2.64 | 4.95 |
| C <sup>24</sup> | 7.44                 | 5.42                  | 6.14 | 2.13 | 2.21 | 4.47 |

**Table S2.** Chemical Shifts of the Trimethylene Tether ( $X^{25}$ ) and Amino Acid Protons.

| Residue  | Chemical Shift (ppm) |                |               |                |                |              |                |      |
|----------|----------------------|----------------|---------------|----------------|----------------|--------------|----------------|------|
|          | $H^{\alpha 1}$       | $H^{\alpha 2}$ | $H^{\beta}$   | $H^{\gamma 1}$ | $H^{\gamma 2}$ |              |                |      |
| $X^{25}$ | 2.55                 | 2.72           | 1.35          | 1.97           | 2.24           |              |                |      |
| $W^{27}$ | $H^{\alpha}$         | $H^{\beta 1}$  | $H^{\beta 2}$ | H2             | H4             | H5           | H6             | H7   |
|          | 4.99                 | 3.14           | 3.42          | 7.38           | 7.80           | 7.23         | 7.31           | 7.55 |
|          | $H^{\alpha}$         | $H^{\beta 1}$  | $H^{\beta 2}$ | $H^{\gamma 1}$ | $H^{\gamma 2}$ | $H^{\delta}$ | $H^{\epsilon}$ |      |
| $K^{26}$ | 3.00                 | 1.56           | 1.56          | 1.23           | 1.31           | 1.68         | 2.96           |      |
| $K^{28}$ | 4.43                 | 1.80           | 1.90          | 1.47           | 1.50           | 1.72         | 3.01           |      |
| $K^{29}$ | 4.19                 | 1.73           | 1.87          | 1.44           | 1.44           | 1.69         | 2.98           |      |

**Table S3.** NOE Distance Restraints Used for the Structure Refinement.<sup>1</sup>

| Residue I<br>No. | Residue I<br>Name | Atom I<br>Name | Residue II<br>No. | Residue II<br>Name | Atom II<br>Name | Lower<br>Bound | Upper<br>Bound |
|------------------|-------------------|----------------|-------------------|--------------------|-----------------|----------------|----------------|
| 1                | DG5               | H3'            | 1                 | DG5                | H8              | 2.43           | 5.84           |
| 1                | DG5               | H2'2           | 1                 | DG5                | H8              | 3.08           | 4.18           |
| 1                | DG5               | H2'2           | 1                 | DG5                | H3'             | 2.10           | 2.84           |
| 1                | DG5               | H2'1           | 1                 | DG5                | H8              | 1.92           | 2.60           |
| 1                | DG5               | H2'1           | 1                 | DG5                | H3'             | 2.36           | 2.91           |
| 2                | DC                | H6             | 1                 | DG5                | H8              | 5.11           | 6.75           |
| 2                | DC                | H6             | 1                 | DG5                | H2'2            | 2.21           | 2.99           |
| 2                | DC                | H5             | 1                 | DG5                | H8              | 3.65           | 4.93           |
| 2                | DC                | H5             | 1                 | DG5                | H2'2            | 2.39           | 3.23           |
| 2                | DC                | H2'1           | 2                 | DC                 | H6              | 1.93           | 2.61           |
| 3                | DT                | M7             | 2                 | DC                 | H6              | 3.41           | 4.61           |
| 3                | DT                | M7             | 2                 | DC                 | H5              | 3.54           | 4.80           |
| 4                | DA                | H8             | 3                 | DT                 | H6              | 3.89           | 5.27           |
| 4                | DA                | H8             | 3                 | DT                 | H2'1            | 2.90           | 4.34           |
| 6                | DC                | H6             | 5                 | DG                 | H8              | 4.66           | 5.74           |
| 6                | DC                | H6             | 5                 | DG                 | H3'             | 3.48           | 5.95           |
| 6                | DC                | H5             | 5                 | DG                 | H8              | 3.30           | 4.46           |
| 6                | DC                | H2'2           | 6                 | DC                 | H6              | 2.79           | 3.77           |
| 6                | DC                | H2'1           | 6                 | DC                 | H6              | 2.22           | 2.90           |
| 6                | DC                | H2'1           | 6                 | DC                 | H5              | 3.09           | 4.65           |
| 7                | DG                | H8             | 6                 | DC                 | H6              | 3.55           | 5.21           |
| 7                | DG                | H8             | 6                 | DC                 | H2'1            | 2.45           | 3.83           |
| 8                | DA                | H8             | 7                 | DG                 | H8              | 4.48           | 6.24           |
| 8                | DA                | H2'2           | 8                 | DA                 | H8              | 2.86           | 3.70           |

|    |     |      |    |     |      |      |      |
|----|-----|------|----|-----|------|------|------|
| 9  | DG  | H8   | 8  | DA  | H8   | 3.23 | 4.37 |
| 9  | DG  | H8   | 8  | DA  | H3'  | 4.16 | 5.62 |
| 9  | DG  | H8   | 8  | DA  | H2'2 | 2.36 | 3.2  |
| 9  | DG  | H3'  | 9  | DG  | H1'  | 3.73 | 4.79 |
| 9  | DG  | H3'  | 9  | DG  | H8   | 4.10 | 5.64 |
| 9  | DG  | H2'1 | 9  | DG  | H3'  | 1.95 | 2.63 |
| 10 | DT  | H6   | 9  | DG  | H8   | 4.45 | 5.75 |
| 10 | DT  | H6   | 9  | DG  | H3'  | 4.76 | 6.72 |
| 10 | DT  | H6   | 9  | DG  | H2'1 | 3.00 | 3.98 |
| 10 | DT  | M7   | 9  | DG  | H8   | 2.95 | 3.99 |
| 10 | DT  | M7   | 9  | DG  | H3'  | 3.52 | 4.76 |
| 10 | DT  | M7   | 9  | DG  | H2'1 | 3.16 | 4.28 |
| 10 | DT  | H3'  | 10 | DT  | H6   | 2.91 | 3.93 |
| 10 | DT  | H2'1 | 10 | DT  | H6   | 1.84 | 2.48 |
| 11 | DC  | H6   | 10 | DT  | H6   | 3.88 | 5.26 |
| 11 | DC  | H6   | 10 | DT  | H2'1 | 3.25 | 4.39 |
| 11 | DC  | H5   | 10 | DT  | H3'  | 3.81 | 4.71 |
| 11 | DC  | H5   | 10 | DT  | H2'1 | 2.48 | 3.36 |
| 11 | DC  | H2'1 | 11 | DC  | H6   | 1.83 | 2.47 |
| 12 | DC3 | H5   | 11 | DC  | H6   | 4.12 | 5.58 |
| 12 | DC3 | H3'  | 12 | DC3 | H6   | 2.20 | 2.98 |
| 12 | DC3 | H3'  | 12 | DC3 | H5   | 5.07 | 6.85 |
| 12 | DC3 | R2'  | 12 | DC3 | H3'  | 2.15 | 2.91 |
| 13 | DG5 | H3'  | 13 | DG5 | H8   | 2.85 | 5.08 |
| 13 | DG5 | H2'2 | 13 | DG5 | H8   | 2.99 | 4.05 |
| 13 | DG5 | H2'1 | 13 | DG5 | H8   | 1.85 | 2.51 |
| 14 | DG  | H8   | 13 | DG5 | H3'  | 4.57 | 5.86 |

|    |    |      |    |     |      |      |      |
|----|----|------|----|-----|------|------|------|
| 14 | DG | H8   | 13 | DG5 | H2'1 | 3.35 | 4.10 |
| 14 | DG | H3'  | 14 | DG  | H8   | 2.59 | 3.51 |
| 15 | DA | H8   | 14 | DG  | H8   | 3.88 | 6.32 |
| 16 | DC | H1'  | 15 | DA  | H2   | 2.94 | 3.98 |
| 16 | DC | H6   | 15 | DA  | H8   | 3.41 | 4.61 |
| 16 | DC | H6   | 15 | DA  | H3'  | 3.95 | 4.97 |
| 16 | DC | H6   | 15 | DA  | H2'2 | 2.24 | 3.02 |
| 16 | DC | H6   | 15 | DA  | H2'1 | 3.08 | 4.08 |
| 16 | DC | H6   | 16 | DC  | H1'  | 2.96 | 3.84 |
| 16 | DC | H5   | 15 | DA  | H8   | 3.37 | 4.55 |
| 16 | DC | H5   | 15 | DA  | H2'2 | 2.91 | 3.93 |
| 16 | DC | H5   | 15 | DA  | H2'1 | 3.19 | 4.31 |
| 16 | DC | H3'  | 16 | DC  | H1'  | 3.79 | 5.19 |
| 16 | DC | H3'  | 16 | DC  | H6   | 3.27 | 4.27 |
| 16 | DC | H2'2 | 16 | DC  | H6   | 2.48 | 4.67 |
| 16 | DC | H2'1 | 16 | DC  | H1'  | 2.19 | 2.97 |
| 16 | DC | H2'1 | 16 | DC  | H6   | 2.47 | 3.39 |
| 16 | DC | H2'1 | 16 | DC  | H5   | 2.60 | 4.30 |
| 17 | DT | M7   | 16 | DC  | H1'  | 4.36 | 5.90 |
| 17 | DT | M7   | 16 | DC  | H6   | 2.63 | 3.55 |
| 17 | DT | M7   | 16 | DC  | H5   | 3.09 | 4.17 |
| 17 | DT | M7   | 16 | DC  | H3'  | 3.10 | 4.20 |
| 17 | DT | M7   | 16 | DC  | H2'2 | 2.93 | 3.97 |
| 17 | DT | H2'1 | 17 | DT  | M7   | 3.52 | 4.76 |
| 18 | DC | H5   | 17 | DT  | M7   | 3.75 | 5.07 |
| 18 | DC | H5   | 17 | DT  | H2'1 | 2.75 | 3.71 |
| 18 | DC | H2'1 | 18 | DC  | H5   | 3.33 | 4.29 |

|    |     |      |    |     |      |      |      |
|----|-----|------|----|-----|------|------|------|
| 19 | DG  | H8   | 18 | DC  | H6   | 4.13 | 5.49 |
| 20 | DC  | H6   | 19 | DG  | H8   | 3.50 | 4.74 |
| 20 | DC  | H5   | 19 | DG  | H8   | 2.81 | 3.81 |
| 20 | DC  | H2'2 | 20 | DC  | H5   | 4.66 | 6.00 |
| 20 | DC  | H2'1 | 20 | DC  | H5   | 3.35 | 4.47 |
| 21 | DT  | M7   | 20 | DC  | H5   | 2.73 | 3.69 |
| 21 | DT  | M7   | 20 | DC  | H3'  | 3.38 | 4.58 |
| 21 | DT  | M7   | 20 | DC  | H2'2 | 3.27 | 4.43 |
| 21 | DT  | M7   | 20 | DC  | H2'1 | 3.26 | 4.40 |
| 21 | DT  | H3'  | 21 | DT  | H6   | 2.96 | 4.00 |
| 21 | DT  | H2'1 | 21 | DT  | M7   | 3.20 | 4.34 |
| 22 | DA  | H8   | 21 | DT  | H6   | 3.71 | 5.01 |
| 22 | DA  | H8   | 21 | DT  | H3'  | 5.03 | 6.81 |
| 22 | DA  | H8   | 21 | DT  | H2'1 | 2.58 | 3.47 |
| 24 | DC3 | H6   | 23 | DG  | H3'  | 3.22 | 5.13 |
| 24 | DC3 | H6   | 23 | DG  | H2'2 | 2.30 | 3.12 |
| 24 | DC3 | H3'  | 24 | DC3 | H6   | 2.70 | 3.64 |
| 25 | X   | HB   | 25 | X   | HA1  | 2.17 | 2.93 |
| 25 | X   | HG1  | 25 | X   | HA1  | 2.22 | 2.88 |
| 25 | X   | HG1  | 25 | X   | HB   | 2.01 | 2.73 |
| 25 | X   | HG2  | 25 | X   | HB   | 2.06 | 2.78 |
| 27 | TRP | HD1  | 25 | X   | HB   | 3.73 | 4.91 |
| 27 | TRP | HD1  | 25 | X   | HG1  | 2.97 | 4.15 |
| 27 | TRP | HD1  | 27 | TRP | HB3  | 2.12 | 2.88 |
| 27 | TRP | HD1  | 27 | TRP | HB2  | 2.89 | 3.91 |
| 27 | TRP | HZ2  | 25 | X   | HB   | 4.22 | 5.70 |
| 27 | TRP | HE3  | 27 | TRP | HB3  | 3.13 | 4.07 |



|    |     |      |    |     |      |      |      |
|----|-----|------|----|-----|------|------|------|
| 27 | TRP | HE3  | 27 | TRP | HB2  | 2.41 | 3.25 |
| 28 | LYS | HG   | 28 | LYS | HB2  | 2.80 | 3.86 |
| 1  | DG5 | H1'  | 1  | DG5 | H8   | 3.46 | 4.68 |
| 1  | DG5 | H1'  | 2  | DC  | H5   | 4.37 | 6.21 |
| 3  | DT  | H1'  | 3  | DT  | H6   | 3.34 | 4.52 |
| 3  | DT  | H1'  | 3  | DT  | H3'  | 3.19 | 4.31 |
| 3  | DT  | H1'  | 3  | DT  | H2'2 | 1.79 | 2.43 |
| 3  | DT  | H1'  | 3  | DT  | H2'1 | 2.42 | 3.08 |
| 2  | DC  | H1'  | 3  | DT  | M7   | 3.76 | 5.08 |
| 2  | DC  | H3'  | 3  | DT  | M7   | 3.28 | 4.44 |
| 2  | DC  | H2'2 | 3  | DT  | M7   | 2.78 | 4.04 |
| 5  | DG  | H1'  | 5  | DG  | H8   | 3.09 | 4.17 |
| 5  | DG  | H1'  | 5  | DG  | H3'  | 3.06 | 4.14 |
| 5  | DG  | H1'  | 6  | DC  | H5   | 4.26 | 5.48 |
| 5  | DG  | H2'2 | 6  | DC  | H6   | 2.29 | 3.09 |
| 5  | DG  | H2'2 | 6  | DC  | H5   | 2.51 | 3.39 |
| 5  | DG  | H2'1 | 6  | DC  | H6   | 2.83 | 3.83 |
| 6  | DC  | H1'  | 6  | DC  | H2'1 | 2.59 | 3.17 |
| 7  | DG  | H1'  | 7  | DG  | H3'  | 2.91 | 3.93 |
| 7  | DG  | H1'  | 8  | DA  | H8   | 2.78 | 3.76 |
| 8  | DA  | H1'  | 8  | DA  | H8   | 3.05 | 4.03 |
| 8  | DA  | H1'  | 8  | DA  | H3'  | 2.93 | 3.97 |
| 8  | DA  | H1'  | 8  | DA  | H2'2 | 2.07 | 2.79 |
| 8  | DA  | H1'  | 25 | X   | HB   | 4.50 | 5.50 |
| 8  | DA  | H2   | 9  | DG  | H1'  | 3.45 | 4.57 |
| 8  | DA  | H2   | 25 | X   | HA1  | 3.08 | 4.18 |
| 8  | DA  | H2   | 25 | X   | HB   | 3.05 | 4.13 |

|    |     |      |    |     |      |      |      |
|----|-----|------|----|-----|------|------|------|
| 8  | DA  | H2   | 27 | TRP | HZ2  | 3.00 | 4.00 |
| 8  | DA  | H2   | 27 | TRP | HH2  | 5.00 | 6.00 |
| 8  | DA  | H2'1 | 9  | DG  | H8   | 2.74 | 3.70 |
| 10 | DT  | H1'  | 10 | DT  | H6   | 3.42 | 4.62 |
| 10 | DT  | H1'  | 11 | DC  | H5   | 3.30 | 4.46 |
| 9  | DG  | H2'2 | 10 | DT  | M7   | 2.49 | 3.85 |
| 11 | DC  | H1'  | 12 | DC3 | H6   | 3.63 | 6.13 |
| 11 | DC  | H1'  | 15 | DA  | H2   | 3.31 | 4.49 |
| 11 | DC  | H3'  | 12 | DC3 | H6   | 4.35 | 5.89 |
| 11 | DC  | H3'  | 12 | DC3 | H5   | 3.90 | 5.18 |
| 12 | DC3 | H1'  | 12 | DC3 | H6   | 3.53 | 4.60 |
| 12 | DC3 | H1'  | 12 | DC3 | H3'  | 3.59 | 5.46 |
| 12 | DC3 | R2'  | 12 | DC3 | H1'  | 1.93 | 2.61 |
| 13 | DG5 | H1'  | 13 | DG5 | H8   | 2.94 | 3.98 |
| 13 | DG5 | H1'  | 13 | DG5 | H2'2 | 1.85 | 2.49 |
| 13 | DG5 | H1'  | 14 | DG  | H8   | 3.52 | 4.32 |
| 14 | DG  | H1'  | 14 | DG  | H8   | 2.87 | 3.87 |
| 14 | DG  | H1'  | 14 | DG  | H3'  | 2.98 | 3.92 |
| 15 | DA  | H1'  | 15 | DA  | H8   | 2.98 | 4.02 |
| 15 | DA  | H1'  | 15 | DA  | H3'  | 3.01 | 4.07 |
| 15 | DA  | H1'  | 15 | DA  | H2'2 | 2.02 | 2.74 |
| 15 | DA  | H1'  | 15 | DA  | H2'1 | 2.36 | 3.20 |
| 15 | DA  | H1'  | 16 | DC  | H6   | 2.66 | 3.60 |
| 15 | DA  | H1'  | 16 | DC  | H5   | 4.51 | 6.11 |
| 17 | DT  | H6   | 17 | DT  | H3'  | 2.86 | 3.88 |
| 17 | DT  | H6   | 18 | DC  | H5   | 2.98 | 4.02 |
| 18 | DC  | H1'  | 18 | DC  | H6   | 3.57 | 4.83 |

|    |     |     |    |     |      |      |      |
|----|-----|-----|----|-----|------|------|------|
| 18 | DC  | H1' | 18 | DC  | H2'2 | 1.93 | 2.61 |
| 18 | DC  | H1' | 27 | TRP | HZ2  | 3.08 | 4.18 |
| 18 | DC  | H1' | 27 | TRP | HH2  | 3.07 | 4.15 |
| 18 | DC  | H3' | 19 | DG  | H8   | 5.01 | 6.79 |
| 19 | DG  | H1' | 19 | DG  | H3'  | 3.10 | 4.08 |
| 19 | DG  | H1' | 20 | DC  | H5   | 3.80 | 5.14 |
| 19 | DG  | H1' | 25 | X   | HB   | 3.96 | 5.36 |
| 20 | DC  | H1' | 20 | DC  | H3'  | 3.73 | 4.71 |
| 20 | DC  | H1' | 20 | DC  | H2'2 | 1.86 | 2.52 |
| 20 | DC  | H1' | 20 | DC  | H2'1 | 2.24 | 3.02 |
| 20 | DC  | H1' | 21 | DT  | M7   | 3.55 | 4.81 |
| 21 | DT  | H1' | 21 | DT  | H6   | 3.01 | 4.07 |
| 21 | DT  | H1' | 21 | DT  | H2'2 | 1.74 | 2.36 |
| 23 | DG  | H1' | 23 | DG  | H3'  | 3.77 | 4.77 |
| 23 | DG  | H1' | 23 | DG  | H2'2 | 1.93 | 2.61 |
| 23 | DG  | H1' | 24 | DC3 | H6   | 2.99 | 4.05 |
| 23 | DG  | H1' | 24 | DC3 | H5   | 4.34 | 5.88 |
| 23 | DG  | H8  | 24 | DC3 | H6   | 3.96 | 4.88 |
| 23 | DG  | H8  | 24 | DC3 | H5   | 3.45 | 4.67 |
| 24 | DC3 | H1' | 24 | DC3 | H6   | 3.12 | 4.22 |
| 24 | DC3 | H1' | 24 | DC3 | H3'  | 3.33 | 4.51 |
| 25 | X   | HA2 | 25 | X   | HB   | 1.94 | 2.62 |
| 19 | DG  | H4' | 26 | LYS | HB3  | 2.63 | 3.57 |
| 19 | DG  | H4' | 26 | LYS | HG   | 3.43 | 4.65 |
| 27 | TRP | HA  | 27 | TRP | HB3  | 2.57 | 3.20 |
| 27 | TRP | HA  | 27 | TRP | HB2  | 1.92 | 2.60 |
| 27 | TRP | HA  | 27 | TRP | HZ3  | 4.42 | 5.98 |

|    |     |      |    |     |      |      |      |
|----|-----|------|----|-----|------|------|------|
| 27 | TRP | HA   | 27 | TRP | HE3  | 2.21 | 2.99 |
| 9  | DG  | H4'  | 27 | TRP | HD1  | 2.52 | 4.86 |
| 9  | DG  | H5'1 | 27 | TRP | HE3  | 4.24 | 5.74 |
| 28 | LYS | HA   | 28 | LYS | HB2  | 2.15 | 2.91 |
| 28 | LYS | HA   | 28 | LYS | HB3  | 1.99 | 2.69 |
| 28 | LYS | HA   | 28 | LYS | HG   | 3.08 | 4.18 |
| 29 | LYS | HA   | 29 | LYS | HB3  | 2.52 | 4.14 |
| 29 | LYS | HA   | 29 | LYS | HG   | 3.65 | 4.53 |
| 2  | DC  | H2'2 | 2  | DC  | H6   | 2.87 | 3.67 |
| 3  | DT  | H3'  | 3  | DT  | H6   | 3.03 | 4.09 |
| 3  | DT  | H2'2 | 3  | DT  | H6   | 2.57 | 3.33 |
| 3  | DT  | H2'2 | 3  | DT  | H3'  | 2.12 | 2.88 |
| 4  | DA  | H8   | 3  | DT  | H2'2 | 2.55 | 3.45 |
| 5  | DG  | H3'  | 5  | DG  | H8   | 3.92 | 4.80 |
| 7  | DG  | H8   | 6  | DC  | H2'2 | 2.51 | 3.39 |
| 7  | DG  | H3'  | 7  | DG  | H8   | 3.69 | 4.71 |
| 14 | DG  | H8   | 13 | DG5 | H2'2 | 2.33 | 3.15 |
| 14 | DG  | H2'2 | 14 | DG  | H8   | 2.67 | 4.01 |
| 14 | DG  | H2'1 | 14 | DG  | H8   | 1.76 | 2.38 |
| 17 | DT  | H2'1 | 17 | DT  | H6   | 1.70 | 2.30 |
| 18 | DC  | H6   | 17 | DT  | H2'2 | 2.47 | 3.26 |
| 18 | DC  | H3'  | 18 | DC  | H6   | 3.82 | 5.03 |
| 18 | DC  | H2'2 | 18 | DC  | H6   | 2.67 | 3.51 |
| 18 | DC  | H2'1 | 18 | DC  | H6   | 1.90 | 2.58 |
| 19 | DG  | H8   | 18 | DC  | H2'2 | 2.4  | 3.26 |
| 22 | DA  | H8   | 21 | DT  | H2'2 | 2.78 | 4.40 |
| 23 | DG  | H3'  | 23 | DG  | H8   | 3.11 | 4.13 |

|    |     |      |    |     |      |      |      |
|----|-----|------|----|-----|------|------|------|
| 26 | LYS | HA   | 25 | X   | HG1  | 2.00 | 2.70 |
| 26 | LYS | HA   | 25 | X   | HG2  | 2.40 | 3.14 |
| 26 | LYS | HB2  | 26 | LYS | HA   | 2.43 | 3.11 |
| 26 | LYS | HB3  | 26 | LYS | HA   | 2.00 | 2.46 |
| 26 | LYS | HG   | 26 | LYS | HB3  | 2.11 | 2.85 |
| 1  | DG5 | H2'1 | 2  | DC  | H6   | 2.65 | 3.81 |
| 1  | DG5 | H3'  | 2  | DC  | H5   | 3.85 | 5.21 |
| 2  | DC  | H1'  | 3  | DT  | H6   | 3.56 | 4.82 |
| 4  | DA  | H3'  | 5  | DG  | H8   | 4.53 | 5.68 |
| 4  | DA  | H2'2 | 5  | DG  | H8   | 2.24 | 3.04 |
| 5  | DG  | H1'  | 5  | DG  | H2'2 | 1.96 | 2.66 |
| 5  | DG  | H1'  | 6  | DC  | H6   | 3.71 | 4.79 |
| 6  | DC  | H1'  | 6  | DC  | H6   | 3.20 | 4.32 |
| 6  | DC  | H1'  | 6  | DC  | H2'2 | 1.98 | 2.68 |
| 6  | DC  | H1'  | 7  | DG  | H8   | 4.74 | 6.42 |
| 7  | DG  | H1'  | 7  | DG  | H8   | 3.33 | 4.51 |
| 8  | DA  | H3'  | 8  | DA  | H2'2 | 2.58 | 3.30 |
| 8  | DA  | H1'  | 8  | DA  | H2'1 | 2.58 | 3.48 |
| 9  | DG  | H3'  | 9  | DG  | H2'2 | 2.31 | 3.15 |
| 9  | DG  | H1'  | 9  | DG  | H2'1 | 2.29 | 3.11 |
| 9  | DG  | H8   | 9  | DG  | H2'1 | 2.00 | 2.70 |
| 10 | DT  | M7   | 10 | DT  | H2'1 | 3.76 | 4.97 |
| 10 | DT  | H1'  | 11 | DC  | H6   | 3.47 | 5.32 |
| 11 | DC  | H1'  | 11 | DC  | H6   | 3.37 | 4.55 |
| 11 | DC  | H1'  | 11 | DC  | H3'  | 3.80 | 5.14 |
| 11 | DC  | H1'  | 11 | DC  | H2'1 | 2.29 | 2.99 |
| 12 | DC3 | R2'  | 12 | DC3 | H6   | 2.37 | 3.21 |

|    |     |      |    |     |      |      |      |
|----|-----|------|----|-----|------|------|------|
| 13 | DG5 | H3'  | 13 | DG5 | H2'2 | 2.86 | 3.56 |
| 13 | DG5 | H3'  | 13 | DG5 | H2'1 | 1.92 | 2.60 |
| 13 | DG5 | H1'  | 13 | DG5 | H2'1 | 2.60 | 3.52 |
| 14 | DG  | H1'  | 14 | DG  | H2'2 | 1.91 | 2.59 |
| 14 | DG  | H1'  | 14 | DG  | H2'1 | 2.88 | 3.74 |
| 16 | DC  | H3'  | 16 | DC  | H2'2 | 2.57 | 3.47 |
| 16 | DC  | H1'  | 17 | DT  | H6   | 4.01 | 5.57 |
| 17 | DT  | H3'  | 17 | DT  | H2'2 | 2.11 | 2.79 |
| 18 | DC  | H1'  | 19 | DG  | H8   | 3.22 | 4.36 |
| 20 | DC  | H3'  | 20 | DC  | H2'2 | 2.74 | 3.78 |
| 21 | DT  | H3'  | 21 | DT  | H2'2 | 2.27 | 3.16 |
| 21 | DT  | H6   | 21 | DT  | H2'1 | 1.75 | 2.37 |
| 22 | DA  | H3'  | 23 | DG  | H8   | 4.42 | 5.64 |
| 22 | DA  | H2'2 | 23 | DG  | H8   | 2.22 | 3.00 |
| 24 | DC3 | H1'  | 24 | DC3 | H2'2 | 1.76 | 2.38 |
| 24 | DC3 | H1'  | 24 | DC3 | H2'1 | 2.90 | 3.92 |
| 24 | DC3 | H3'  | 24 | DC3 | H2'1 | 1.98 | 2.68 |
| 8  | DA  | H2   | 25 | X   | HA2  | 2.80 | 3.90 |
| 8  | DA  | H2   | 25 | X   | HG1  | 4.06 | 5.32 |
| 25 | X   | HA1  | 25 | X   | HG2  | 2.42 | 5.04 |
| 19 | DG  | H4'  | 26 | LYS | HB2  | 2.08 | 2.82 |
| 28 | LYS | HA   | 28 | LYS | HD   | 3.79 | 5.87 |
| 2  | DC  | H3'  | 2  | DC  | H6   | 2.87 | 3.68 |
| 3  | DT  | H6   | 2  | DC  | H6   | 3.97 | 5.37 |
| 5  | DG  | H2'2 | 5  | DG  | H8   | 2.82 | 3.68 |
| 5  | DG  | H2'1 | 5  | DG  | H8   | 1.85 | 2.49 |
| 6  | DC  | H5   | 5  | DG  | H2'1 | 2.83 | 3.83 |

|    |     |      |    |     |      |      |      |
|----|-----|------|----|-----|------|------|------|
| 11 | DC  | H2'1 | 11 | DC  | H5   | 3.14 | 4.14 |
| 12 | DC3 | H6   | 11 | DC  | H2'2 | 2.34 | 3.16 |
| 12 | DC3 | H6   | 11 | DC  | H2'1 | 2.42 | 3.28 |
| 12 | DC3 | H5   | 11 | DC  | H2'1 | 3.21 | 4.41 |
| 12 | DC3 | R2'  | 12 | DC3 | H5   | 3.95 | 5.51 |
| 23 | DG  | H8   | 22 | DA  | H8   | 3.73 | 5.05 |
| 23 | DG  | H2'2 | 23 | DG  | H8   | 2.49 | 3.37 |
| 23 | DG  | H2'1 | 23 | DG  | H8   | 1.91 | 2.59 |
| 1  | DG5 | H1'  | 1  | DG5 | H2'1 | 2.53 | 3.05 |
| 1  | DG5 | H1'  | 2  | DC  | H6   | 2.53 | 3.43 |
| 2  | DC  | H1'  | 2  | DC  | H6   | 3.08 | 4.16 |
| 2  | DC  | H2'1 | 3  | DT  | M7   | 2.76 | 3.74 |
| 4  | DA  | H1'  | 4  | DA  | H2'2 | 1.86 | 2.52 |
| 4  | DA  | H1'  | 5  | DG  | H8   | 3.35 | 4.53 |
| 4  | DA  | H8   | 5  | DG  | H8   | 3.59 | 4.85 |
| 4  | DA  | H2'1 | 5  | DG  | H8   | 3.29 | 4.05 |
| 5  | DG  | H3'  | 5  | DG  | H2'2 | 2.12 | 2.80 |
| 5  | DG  | H3'  | 5  | DG  | H2'1 | 2.11 | 2.85 |
| 8  | DA  | H8   | 8  | DA  | H3'  | 3.18 | 4.22 |
| 9  | DG  | H1'  | 9  | DG  | H2'2 | 1.86 | 2.52 |
| 9  | DG  | H8   | 9  | DG  | H2'2 | 3.03 | 3.93 |
| 10 | DT  | H6   | 10 | DT  | H2'2 | 2.63 | 3.55 |
| 10 | DT  | H1'  | 10 | DT  | H2'1 | 2.31 | 3.03 |
| 10 | DT  | M7   | 11 | DC  | H5   | 3.55 | 4.81 |
| 11 | DC  | H6   | 11 | DC  | H3'  | 2.37 | 3.21 |
| 11 | DC  | H1'  | 11 | DC  | H2'2 | 1.79 | 2.41 |
| 14 | DG  | H3'  | 14 | DG  | H2'2 | 2.33 | 3.15 |

|    |     |      |    |     |      |      |      |
|----|-----|------|----|-----|------|------|------|
| 14 | DG  | H3'  | 14 | DG  | H2'1 | 2.21 | 2.99 |
| 16 | DC  | H2'1 | 17 | DT  | M7   | 3.19 | 4.31 |
| 17 | DT  | H1'  | 17 | DT  | H3'  | 3.02 | 4.08 |
| 17 | DT  | H2'1 | 18 | DC  | H6   | 2.73 | 3.38 |
| 17 | DT  | H2'2 | 18 | DC  | H5   | 3.49 | 4.73 |
| 21 | DT  | H1'  | 22 | DA  | H8   | 3.84 | 6.08 |
| 22 | DA  | H1'  | 22 | DA  | H2'2 | 1.80 | 2.44 |
| 22 | DA  | H1'  | 23 | DG  | H8   | 3.93 | 5.31 |
| 22 | DA  | H3'  | 22 | DA  | H2'2 | 2.25 | 2.93 |
| 22 | DA  | H2'1 | 23 | DG  | H8   | 3.02 | 4.15 |
| 23 | DG  | H3'  | 23 | DG  | H2'2 | 2.46 | 3.08 |
| 23 | DG  | H3'  | 23 | DG  | H2'1 | 2.19 | 2.97 |
| 25 | X   | HA2  | 25 | X   | HG2  | 2.59 | 3.91 |
| 27 | TRP | HA   | 27 | TRP | HD1  | 3.25 | 4.19 |
| 28 | LYS | HB3  | 28 | LYS | HG   | 2.78 | 3.76 |
| 29 | LYS | HA   | 29 | LYS | HB2  | 2.49 | 3.47 |
| 3  | DT  | H6   | 2  | DC  | H3'  | 4.25 | 5.51 |
| 21 | DT  | H6   | 20 | DC  | H2'2 | 2.32 | 3.14 |
| 22 | DA  | H2'1 | 22 | DA  | H3'  | 1.96 | 2.64 |
| 24 | DC3 | H2'2 | 24 | DC3 | H6   | 2.60 | 3.52 |
| 26 | LYS | HB3  | 25 | X   | HG1  | 3.01 | 4.07 |
| 1  | DG5 | H1'  | 1  | DG5 | H3'  | 2.97 | 4.03 |
| 1  | DG5 | H2'1 | 2  | DC  | H5   | 2.52 | 3.40 |
| 2  | DC  | H1'  | 2  | DC  | H3'  | 3.33 | 4.51 |
| 2  | DC  | H2'2 | 3  | DT  | H6   | 2.21 | 2.99 |
| 4  | DA  | H1'  | 4  | DA  | H8   | 2.84 | 3.84 |
| 4  | DA  | H1'  | 4  | DA  | H3'  | 3.58 | 4.44 |



|    |     |      |    |     |      |      |      |
|----|-----|------|----|-----|------|------|------|
| 5  | DG  | H1'  | 5  | DG  | H2'1 | 2.21 | 2.99 |
| 8  | DA  | H8   | 8  | DA  | H2'1 | 2.06 | 2.78 |
| 8  | DA  | H3'  | 8  | DA  | H2'1 | 2.11 | 2.85 |
| 9  | DG  | H1'  | 9  | DG  | H8   | 3.84 | 4.78 |
| 9  | DG  | H2'2 | 10 | DT  | H6   | 2.14 | 2.90 |
| 10 | DT  | H1'  | 10 | DT  | H3'  | 3.08 | 4.18 |
| 10 | DT  | H1'  | 10 | DT  | H2'2 | 1.77 | 2.39 |
| 17 | DT  | H1'  | 17 | DT  | H6   | 2.86 | 3.76 |
| 17 | DT  | H3'  | 18 | DC  | H6   | 3.66 | 4.80 |
| 20 | DC  | H6   | 20 | DC  | H2'2 | 2.91 | 3.79 |
| 22 | DA  | H1'  | 22 | DA  | H8   | 2.90 | 3.82 |
| 22 | DA  | H1'  | 22 | DA  | H3'  | 3.17 | 4.29 |
| 23 | DG  | H1'  | 23 | DG  | H8   | 3.59 | 4.85 |
| 23 | DG  | H2'1 | 24 | DC3 | H6   | 2.81 | 3.69 |
| 23 | DG  | H2'2 | 24 | DC3 | H5   | 3.48 | 4.70 |
| 25 | X   | HA2  | 25 | X   | HG1  | 2.16 | 2.92 |
| 26 | LYS | HG   | 26 | LYS | HE   | 3.62 | 4.50 |
| 8  | DA  | H1'  | 27 | TRP | HD1  | 2.74 | 3.70 |
| 9  | DG  | H5'1 | 27 | TRP | HZ3  | 5.00 | 6.00 |
| 28 | LYS | HG   | 28 | LYS | HD   | 2.53 | 3.59 |
| 28 | LYS | HG   | 28 | LYS | HE   | 3.62 | 4.88 |
| 3  | DT  | H6   | 2  | DC  | H2'1 | 2.27 | 2.93 |
| 3  | DT  | H2'1 | 3  | DT  | H6   | 2.13 | 2.87 |
| 4  | DA  | H3'  | 4  | DA  | H8   | 2.98 | 4.18 |
| 4  | DA  | H2'2 | 4  | DA  | H8   | 2.75 | 3.47 |
| 4  | DA  | H2'2 | 4  | DA  | H3'  | 2.35 | 3.17 |
| 4  | DA  | H2'1 | 4  | DA  | H8   | 1.99 | 2.53 |

|    |     |      |    |    |      |      |      |
|----|-----|------|----|----|------|------|------|
| 4  | DA  | H2'1 | 4  | DA | H3'  | 2.22 | 3.29 |
| 8  | DA  | H8   | 7  | DG | H2'2 | 2.58 | 3.50 |
| 8  | DA  | H8   | 7  | DG | H2'1 | 3.26 | 4.40 |
| 11 | DC  | H6   | 10 | DT | H2'2 | 2.13 | 2.75 |
| 11 | DC  | H5   | 10 | DT | H6   | 3.30 | 4.46 |
| 11 | DC  | H5   | 10 | DT | H2'2 | 2.74 | 3.50 |
| 11 | DC  | H2'2 | 11 | DC | H6   | 2.84 | 3.62 |
| 12 | DC3 | H5   | 11 | DC | H2'2 | 3.39 | 4.59 |
| 15 | DA  | H3'  | 15 | DA | H8   | 2.87 | 4.13 |
| 15 | DA  | H2'2 | 15 | DA | H8   | 2.71 | 3.57 |
| 15 | DA  | H2'2 | 15 | DA | H3'  | 2.09 | 2.83 |
| 15 | DA  | H2'1 | 15 | DA | H8   | 2.20 | 2.96 |
| 15 | DA  | H2'1 | 15 | DA | H3'  | 2.30 | 2.88 |
| 17 | DT  | H6   | 16 | DC | H2'2 | 2.73 | 3.69 |
| 17 | DT  | H6   | 16 | DC | H2'1 | 2.23 | 3.03 |
| 17 | DT  | H2'2 | 17 | DT | H6   | 2.75 | 3.61 |
| 18 | DC  | H2'2 | 18 | DC | H3'  | 2.05 | 2.77 |
| 18 | DC  | H2'1 | 18 | DC | H3'  | 2.17 | 2.93 |
| 20 | DC  | H6   | 19 | DG | H2'2 | 2.69 | 3.71 |
| 20 | DC  | H6   | 19 | DG | H2'1 | 2.88 | 3.90 |
| 20 | DC  | H5   | 19 | DG | H2'2 | 3.14 | 4.26 |
| 20 | DC  | H5   | 19 | DG | H2'1 | 3.25 | 4.39 |
| 20 | DC  | H3'  | 20 | DC | H6   | 3.15 | 3.85 |
| 20 | DC  | H2'1 | 20 | DC | H6   | 2.17 | 3.15 |
| 20 | DC  | H2'1 | 20 | DC | H3'  | 1.92 | 2.60 |
| 21 | DT  | H6   | 20 | DC | H2'1 | 3.02 | 3.90 |
| 21 | DT  | M7   | 20 | DC | H6   | 2.59 | 3.51 |

|    |     |      |    |     |      |      |      |
|----|-----|------|----|-----|------|------|------|
| 21 | DT  | H2'1 | 21 | DT  | H3'  | 1.86 | 2.52 |
| 24 | DC3 | H5   | 23 | DG  | H2'1 | 4.17 | 5.65 |
| 24 | DC3 | H2'1 | 24 | DC3 | H5   | 3.50 | 4.74 |
| 26 | LYS | HG   | 26 | LYS | HA   | 2.19 | 2.97 |
| 26 | LYS | HD   | 26 | LYS | HA   | 3.47 | 4.69 |
| 26 | LYS | HD   | 26 | LYS | HG   | 2.52 | 3.40 |
| 26 | LYS | HE   | 26 | LYS | HD   | 2.50 | 3.50 |
| 27 | TRP | HZ2  | 25 | X   | HA2  | 3.17 | 4.29 |
| 27 | TRP | HZ2  | 25 | X   | HA1  | 3.82 | 5.10 |
| 1  | DG5 | H1'  | 1  | DG5 | H2'2 | 1.86 | 2.52 |
| 2  | DC  | H1'  | 2  | DC  | H2'2 | 2.00 | 2.62 |
| 2  | DC  | H1'  | 2  | DC  | H2'1 | 2.42 | 3.28 |
| 2  | DC  | H5   | 2  | DC  | H2'2 | 4.28 | 5.62 |
| 2  | DC  | H5   | 2  | DC  | H2'1 | 3.26 | 4.30 |
| 2  | DC  | H3'  | 2  | DC  | H2'2 | 2.38 | 3.12 |
| 2  | DC  | H3'  | 2  | DC  | H2'1 | 2.24 | 2.92 |
| 3  | DT  | H3'  | 3  | DT  | H2'1 | 2.15 | 2.63 |
| 3  | DT  | H1'  | 4  | DA  | H8   | 2.81 | 3.73 |
| 4  | DA  | H1'  | 4  | DA  | H2'1 | 2.23 | 3.01 |
| 6  | DC  | H1'  | 6  | DC  | H3'  | 3.26 | 6.02 |
| 7  | DG  | H1'  | 7  | DG  | H2'2 | 2.58 | 3.50 |
| 7  | DG  | H1'  | 7  | DG  | H2'1 | 2.41 | 3.25 |
| 7  | DG  | H8   | 7  | DG  | H2'2 | 2.56 | 3.58 |
| 7  | DG  | H8   | 7  | DG  | H2'1 | 1.92 | 2.60 |
| 7  | DG  | H3'  | 7  | DG  | H2'2 | 2.09 | 2.75 |
| 7  | DG  | H3'  | 7  | DG  | H2'1 | 2.32 | 3.10 |
| 8  | DA  | H1'  | 9  | DG  | H8   | 2.83 | 3.52 |

|    |    |      |    |     |      |      |      |
|----|----|------|----|-----|------|------|------|
| 8  | DA | H1'  | 25 | X   | HA2  | 3.00 | 4.00 |
| 8  | DA | H1'  | 25 | X   | HA1  | 3.38 | 4.96 |
| 9  | DG | H1'  | 10 | DT  | H6   | 3.32 | 4.22 |
| 9  | DG | H1'  | 27 | TRP | HZ2  | 3.30 | 4.46 |
| 10 | DT | H3'  | 10 | DT  | H2'2 | 2.07 | 2.81 |
| 10 | DT | H3'  | 10 | DT  | H2'1 | 1.90 | 2.56 |
| 11 | DC | H3'  | 11 | DC  | H2'2 | 2.14 | 2.90 |
| 11 | DC | H3'  | 11 | DC  | H2'1 | 2.04 | 2.76 |
| 14 | DG | H1'  | 15 | DA  | H8   | 3.47 | 4.69 |
| 14 | DG | H2'2 | 15 | DA  | H8   | 2.00 | 2.70 |
| 14 | DG | H2'1 | 15 | DA  | H8   | 2.25 | 3.05 |
| 16 | DC | H1'  | 16 | DC  | H2'2 | 1.82 | 2.46 |
| 16 | DC | H3'  | 16 | DC  | H2'1 | 1.96 | 2.66 |
| 17 | DT | H1'  | 17 | DT  | H2'2 | 1.84 | 2.5  |
| 17 | DT | H1'  | 17 | DT  | H2'1 | 2.22 | 3.00 |
| 17 | DT | H1'  | 18 | DC  | H6   | 3.19 | 4.25 |
| 17 | DT | H3'  | 17 | DT  | H2'1 | 1.80 | 2.44 |
| 18 | DC | H1'  | 18 | DC  | H3'  | 3.52 | 4.76 |
| 18 | DC | H1'  | 18 | DC  | H2'1 | 2.71 | 3.35 |
| 19 | DG | H1'  | 19 | DG  | H2'2 | 2.37 | 3.21 |
| 19 | DG | H1'  | 19 | DG  | H2'1 | 2.56 | 3.46 |
| 19 | DG | H1'  | 20 | DC  | H6   | 3.07 | 4.15 |
| 19 | DG | H8   | 19 | DG  | H2'2 | 2.76 | 3.50 |
| 19 | DG | H8   | 19 | DG  | H2'1 | 1.98 | 2.86 |
| 19 | DG | H3'  | 19 | DG  | H2'2 | 2.45 | 3.31 |
| 19 | DG | H3'  | 19 | DG  | H2'1 | 2.13 | 3.06 |
| 20 | DC | H1'  | 20 | DC  | H6   | 2.68 | 3.62 |

|    |     |      |    |     |      |      |      |
|----|-----|------|----|-----|------|------|------|
| 20 | DC  | H1'  | 21 | DT  | H6   | 3.59 | 4.85 |
| 21 | DT  | H1'  | 21 | DT  | H3'  | 3.72 | 5.04 |
| 21 | DT  | H1'  | 21 | DT  | H2'1 | 2.68 | 3.62 |
| 22 | DA  | H8   | 22 | DA  | H3'  | 2.95 | 3.91 |
| 22 | DA  | H8   | 22 | DA  | H2'2 | 3.17 | 4.14 |
| 22 | DA  | H8   | 22 | DA  | H2'1 | 1.90 | 2.50 |
| 22 | DA  | H1'  | 22 | DA  | H2'1 | 2.32 | 3.04 |
| 23 | DG  | H1'  | 23 | DG  | H2'1 | 2.33 | 3.01 |
| 24 | DC3 | H6   | 24 | DC3 | H2'1 | 1.73 | 2.35 |
| 25 | X   | HB   | 26 | LYS | HA   | 3.00 | 4.00 |
| 26 | LYS | HB2  | 26 | LYS | HG   | 2.16 | 2.92 |
| 19 | DG  | H4'  | 26 | LYS | HD   | 3.59 | 4.85 |
| 9  | DG  | H5'1 | 27 | TRP | HD1  | 3.01 | 3.77 |
| 9  | DG  | H5'2 | 27 | TRP | HD1  | 3.00 | 4.00 |
| 18 | DC  | H5'1 | 27 | TRP | HH2  | 2.91 | 3.93 |
| 18 | DC  | H4'  | 27 | TRP | HH2  | 3.14 | 4.26 |
| 29 | LYS | HG   | 29 | LYS | HE   | 3.62 | 5.12 |
| 29 | LYS | HD   | 29 | LYS | HE   | 2.50 | 3.50 |
| 27 | TRP | HN   | 26 | LYS | HG   | 2.50 | 3.50 |
| 27 | TRP | HN   | 26 | LYS | HB2  | 3.50 | 4.50 |
| 27 | TRP | HN   | 26 | LYS | HB3  | 3.50 | 4.50 |
| 27 | TRP | HN   | 27 | TRP | HB2  | 3.00 | 4.00 |
| 27 | TRP | HN   | 27 | TRP | HB3  | 2.50 | 3.50 |
| 27 | TRP | HN   | 26 | LYS | HA   | 2.00 | 3.00 |
| 27 | TRP | HN   | 27 | TRP | HA   | 2.50 | 3.50 |
| 27 | TRP | HN   | 27 | TRP | HD1  | 3.50 | 4.50 |
| 27 | TRP | HN   | 27 | TRP | HE3  | 4.00 | 5.00 |

|    |     |    |    |     |     |      |      |
|----|-----|----|----|-----|-----|------|------|
| 28 | LYS | HN | 26 | LYS | HG  | 4.00 | 5.00 |
| 28 | LYS | HN | 28 | LYS | HG  | 3.00 | 4.00 |
| 28 | LYS | HN | 28 | LYS | HD  | 3.50 | 4.50 |
| 28 | LYS | HN | 28 | LYS | HB2 | 3.00 | 4.00 |
| 28 | LYS | HN | 28 | LYS | HB3 | 3.00 | 4.00 |
| 28 | LYS | HN | 27 | TRP | HB2 | 3.50 | 4.50 |
| 28 | LYS | HN | 27 | TRP | HB3 | 3.50 | 4.50 |
| 28 | LYS | HN | 19 | DG  | H4' | 4.00 | 5.00 |
| 28 | LYS | HN | 28 | LYS | HA  | 2.50 | 3.50 |
| 28 | LYS | HN | 27 | TRP | HA  | 2.00 | 3.00 |
| 28 | LYS | HN | 27 | TRP | HE3 | 3.50 | 4.50 |
| 28 | LYS | HN | 29 | LYS | HN  | 3.50 | 4.50 |
| 29 | LYS | HN | 29 | LYS | HG  | 2.50 | 3.50 |
| 29 | LYS | HN | 28 | LYS | HG  | 3.00 | 4.00 |
| 29 | LYS | HN | 29 | LYS | HD  | 3.00 | 4.00 |
| 29 | LYS | HN | 29 | LYS | HB2 | 2.50 | 3.50 |
| 29 | LYS | HN | 28 | LYS | HG  | 3.00 | 4.00 |
| 29 | LYS | HN | 28 | LYS | HB2 | 3.00 | 4.00 |
| 29 | LYS | HN | 29 | LYS | HB3 | 3.00 | 4.00 |
| 29 | LYS | HN | 28 | LYS | HB3 | 2.00 | 3.00 |
| 29 | LYS | HN | 29 | LYS | HA  | 2.50 | 3.50 |
| 29 | LYS | HN | 28 | LYS | HA  | 2.00 | 3.00 |

<sup>1</sup>X<sup>25</sup> is the trimethylene tether; amino acid protons were named based upon the AMBER nomenclature; M7 is the thymine methyl; R2' is the deoxyribose geminal H2'(") protons.

Table S4. Backbone Torsion Angles of the Refined Structure.<sup>1</sup>

| Nucleotide      | Alpha | Beta   | Gamma  | Delta | Epsilon | Zeta   | Chi    |
|-----------------|-------|--------|--------|-------|---------|--------|--------|
| G <sup>1</sup>  |       |        | 52.6   | 141.1 | -177.2  | -95.7  | -118.8 |
| C <sup>2</sup>  | -69.0 | -178.8 | 54.0   | 122.0 | -171.2  | -88.1  | -120.0 |
| T <sup>3</sup>  | -65.8 | 167.9  | 54.8   | 124.1 | -176.6  | -94.1  | -109.8 |
| A <sup>4</sup>  | -70.0 | 178.7  | 48.8   | 120.2 | -177.9  | -94.3  | -118.9 |
| G <sup>5</sup>  | -65.5 | -179.0 | 48.7   | 118.5 | -173.4  | -99.1  | -121.1 |
| C <sup>6</sup>  | -70.4 | 177.3  | 55.0   | 113.2 | -166.8  | -85.9  | -123.9 |
| G <sup>7</sup>  | -67.9 | 170.9  | 52.5   | 134.9 | -168.6  | -130.4 | -100.4 |
| A <sup>8</sup>  | -64.9 | 176.1  | 54.1   | 144.5 | 178.9   | -93.1  | -101.2 |
| G <sup>9</sup>  | -66.5 | 171.7  | 55.8   | 120.1 | -174.6  | -98.6  | -134.6 |
| T <sup>10</sup> | -68.5 | -173.8 | 50.7   | 123.7 | -171.9  | -98.4  | -123.1 |
| C <sup>11</sup> | -73.1 | 175.7  | 56.9   | 111.0 | -172.0  | -83.5  | -119.8 |
| C <sup>12</sup> | -68.1 | 166.6  | 50.1   | 88.4  |         |        | -131.1 |
| G <sup>13</sup> |       |        | -174.4 | 151.0 | -175.6  | -91.7  | -92.2  |
| G <sup>14</sup> | -69.5 | 162.5  | 57.5   | 97.0  | -178.3  | -90.8  | -124.8 |
| A <sup>15</sup> | -63.0 | 173.4  | 59.6   | 139.9 | -179.6  | -89.7  | -103.7 |
| C <sup>16</sup> | -63.9 | 163.5  | 62.8   | 104.0 | -170.9  | -85.0  | -137.1 |
| T <sup>17</sup> | -66.3 | 178.4  | 52.1   | 116.1 | -167.0  | -86.0  | -123.5 |
| C <sup>18</sup> | -69.8 | 166.9  | 55.0   | 115.6 | -172.1  | -107.5 | -114.8 |
| G <sup>19</sup> | -69.3 | -171.9 | 47.9   | 143.6 | 179.5   | -90.9  | -98.5  |
| C <sup>20</sup> | -67.3 | 170.4  | 58.8   | 103.9 | -174.6  | -88.4  | -128.3 |
| T <sup>21</sup> | -65.3 | 170.0  | 56.3   | 113.6 | -168.2  | -84.9  | -125.6 |
| A <sup>22</sup> | -70.3 | 172.5  | 50.2   | 99.0  | -174.0  | -92.3  | -129.4 |
| G <sup>23</sup> | -65.9 | 179.8  | 51.2   | 133.2 | -174.4  | -90.1  | -106.3 |
| C <sup>24</sup> | -65.9 | 166.8  | 56.5   | 108.2 |         |        | -123.1 |

<sup>1</sup>alpha: O3'(i-1)-P-O5'-C5'; beta: P-O5'-C5'-C4'; gamma: O5'-C5'-C4'-C3'; delta: C5'-C4'-C3'-

O3'; epsilon: C4'-C3'-O3'-P(i+1); zeta: C3'-O3'-P(i+1)-O5'(i+1); chi for pyrimidines: O4'-C1'-N1-C2; chi for purines: O4'-C1'-N9-C4.





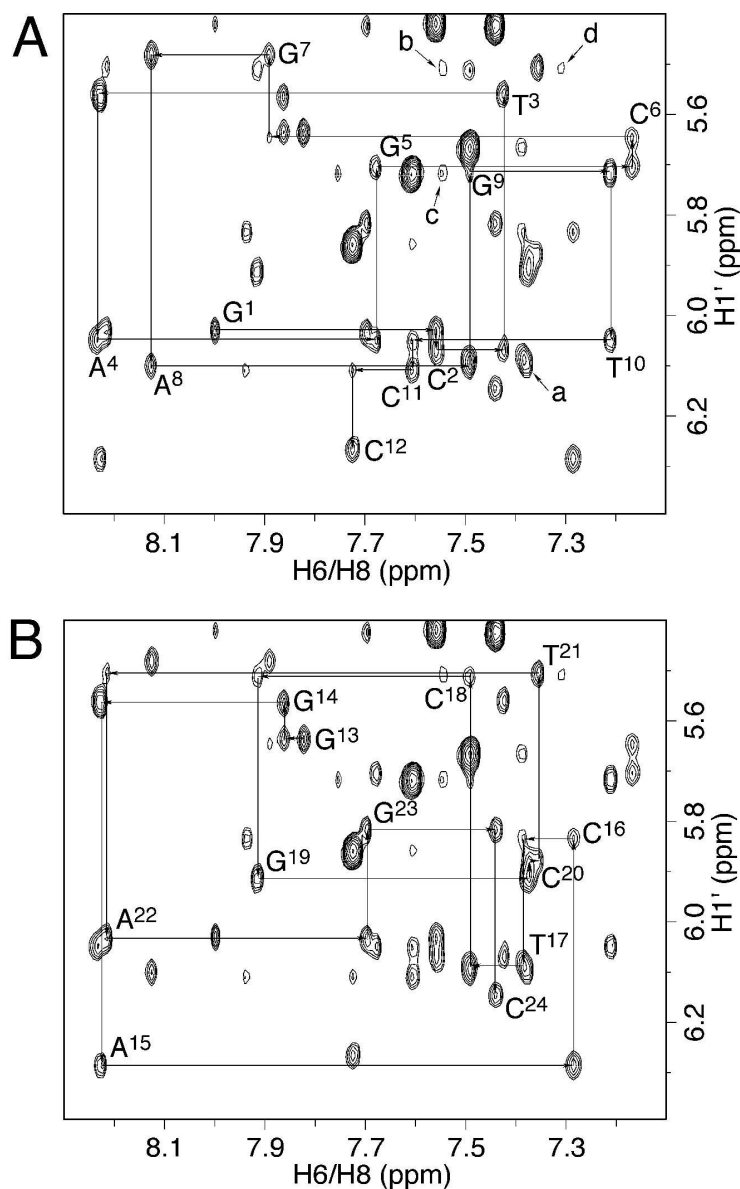

**Figure S2.** NOE connectivity of nucleobase H6/H8 protons to deoxyribose H1' protons. (A) KWKK-conjugated strand; (B) Complementary strand. The complete connectivity suggested the DNA-KWKK conjugate maintained an ordered right-handed helix. The C<sup>6</sup> H1'→G<sup>7</sup> H8 NOE was weak, indicating a structural perturbation at the conjugated G<sup>7</sup> nucleobase. The additional cross-peaks were assigned as: a, W<sup>27</sup> H2→A<sup>8</sup> H1'; b, W<sup>27</sup> H7→C<sup>18</sup> H1'; c, W<sup>27</sup> H7→G<sup>9</sup> H1'; d, W<sup>27</sup> H6→C<sup>18</sup> H1'. The NOESY data were collected at 250 ms mixing time.

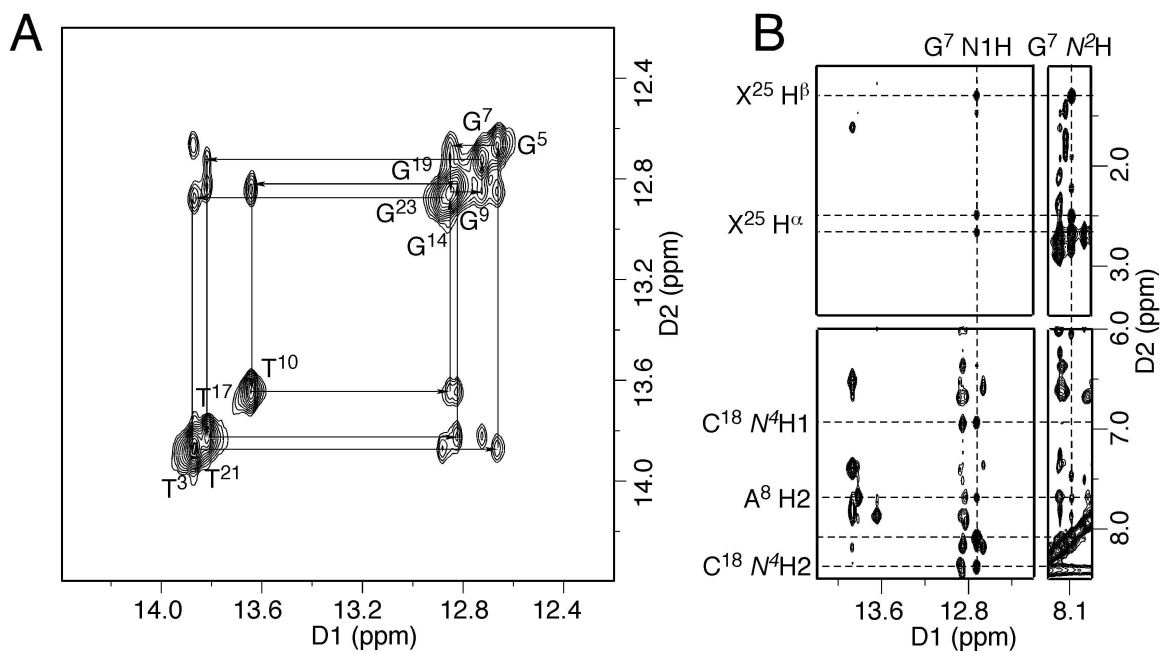

**Figure S3.** Assignment of nucleotide exchangeable protons. (A) NOE connectivity of the nucleobase imino protons. (B) NOEs observed for the imino and amino protons of the conjugated nucleotide G<sup>7</sup>. The G<sup>7</sup> N<sup>2</sup>H exocyclic amino proton was observed, indicating it was shielded from solvent. The NOESY data were collected at 250 ms mixing time.

**Figure S4.** Chemical shift perturbations of the DNA-peptide conjugate. (A) KWKK-conjugated strand; (B) Complementary strand; (C) Peptide.

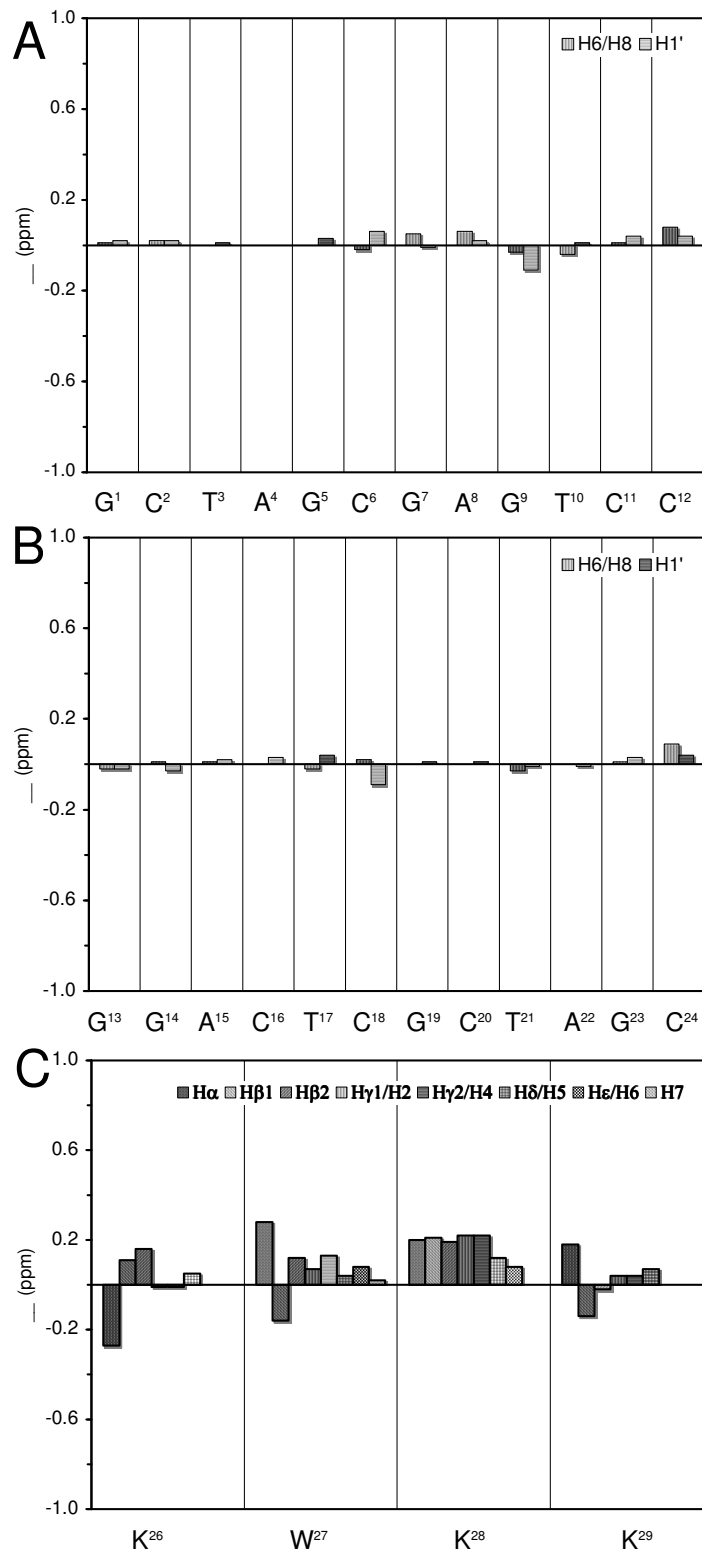

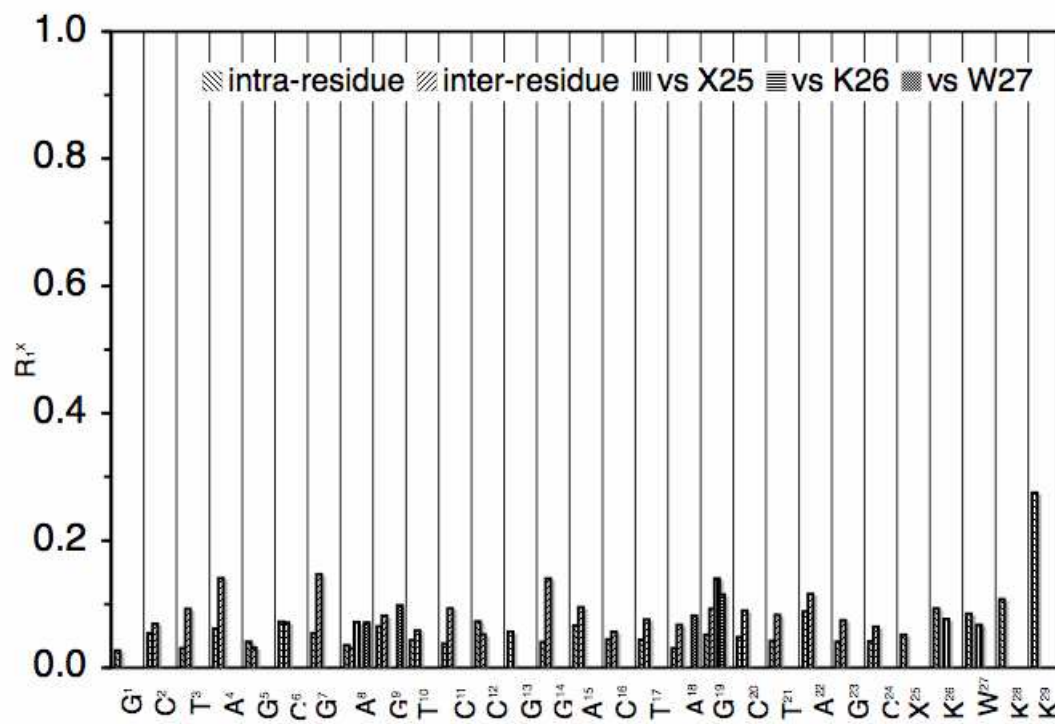

**Figure S5.** Sixth root CORMA residuals ( $R_1^x$ ) of the DNA-KWKK conjugate.
